# Supplementary material
Source: PubMed Central journal article supplement (PMC7486063)
Supplement: NIHMS1625358-supplement-AStoddart_Supplement.pdf [file NIHMS1625358-supplement-AStoddart_Supplement.pdf]

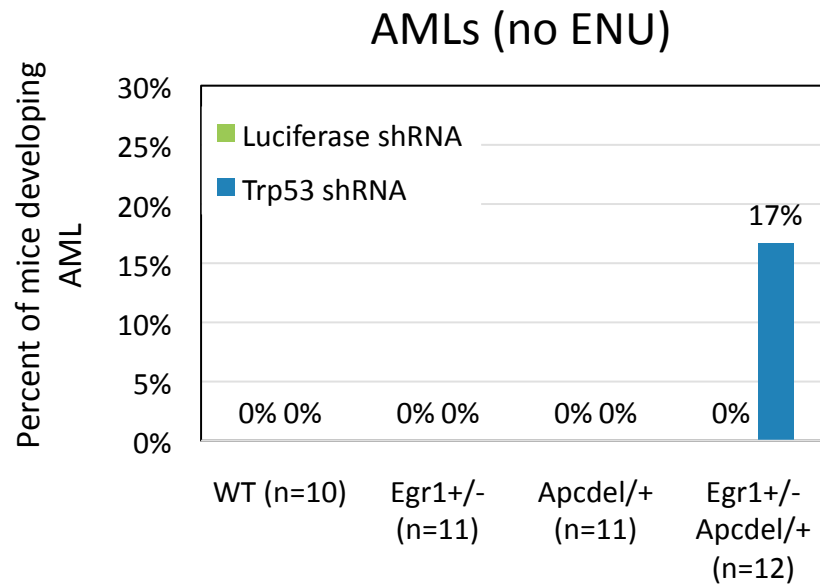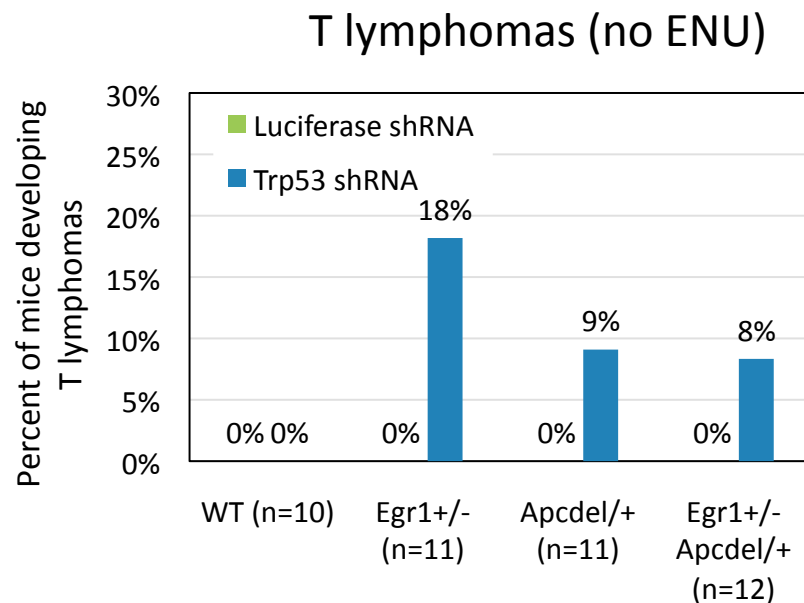

**Supplemental Figure 1. Cell intrinsic haploinsufficiency loss of *Egr1*, *Apc* with *Trp53* knockdown promotes AML at a low frequency in the absence of ENU.** *Egr1*<sup>+/+</sup> (WT); *Egr1*<sup>+/-</sup>; *Apc*<sup>del/+</sup>; or *Egr1*<sup>+/-</sup>; *Apc*<sup>del/+</sup> bone marrow was transduced with luciferase (control) or *Trp53* shRNA and transplanted into lethally irradiated WT recipients and monitored for disease (previously published Stoddart et al., 2014). The percent of mice developing AML (upper panel) and T lymphomas (lower panel) is shown. AML development was only observed with loss of *Egr1*, *Apc* and *Trp53*.

## ENU treated mice

Stoddart et al.

**A**

| Mouse | Survival (days) | Disease Equivalent         | Myeloid Blasts (%) | Transplantable |
|-------|-----------------|----------------------------|--------------------|----------------|
| 6322  | 234             | T lymphoma                 | NA                 | ND             |
| 6362  | 199             | T lymphoma                 | NA                 | ND             |
| 6333  | 151             | MDS, RAEB-1;<br>T lymphoma | 6%                 | ND             |
| 7089  | 102             | MDS, RAEB-1;<br>T lymphoma | 9%                 | ND             |
| 6327  | 139             | MDS, RAEB-2                | 18%                | No             |
| 7104  | 263             | MDS, RAEB-2;<br>T lymphoma | 19%                | ND             |
| 6323  | 356             | AML                        | 28%                | No             |
| 7074  | 382             | AML                        | 30%                | Yes            |
| 7103  | 157             | AML                        | 68%                | Yes            |
| 7101  | 200             | AML                        | 78%                | Yes            |
| 7105  | 327             | AML                        | >20%               | ND             |

**B**

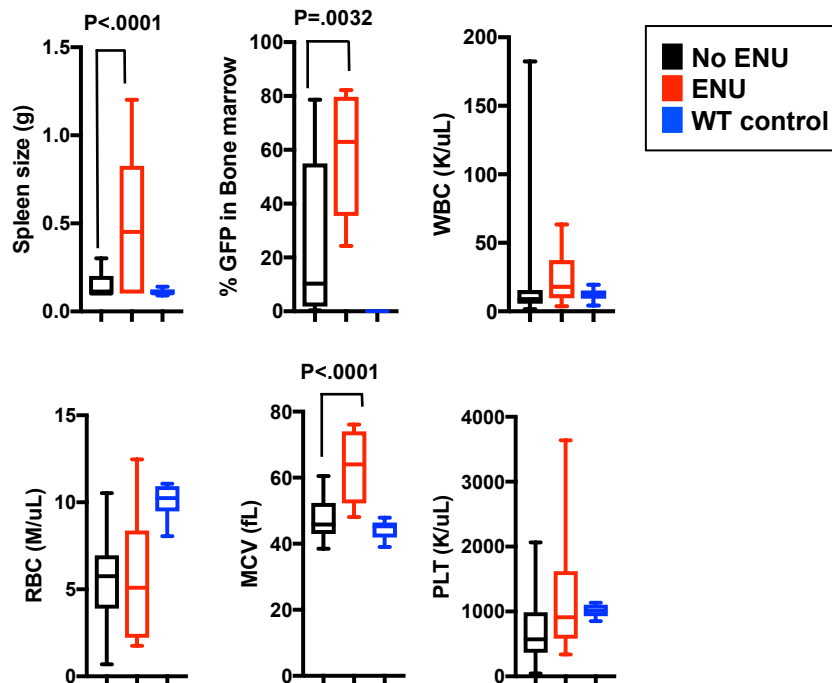

**Supplemental Figure 2. Hematological parameters in ENU-treated mice and in mice without ENU treatment.** *Egr1*<sup>+/-</sup>, *Apc*<sup>del/+</sup> bone marrow cells were transduced with *Trp53* shRNA, and transplanted into lethally-irradiated WT recipient mice. ENU treatment is described in Fig. 1 (A) A summary of the characteristics of the ENU-treated mice and the human equivalent disease. NA, not applicable; ND, not determined. About half of the ENU-treated mice developed AML (>20% myeloid blasts), and ~40% developed MDS. (B) At the time of sacrifice, spleen weights, percent of GFP<sup>+</sup> cells in the BM, white blood cell (WBC) counts, red blood cell (RBC) counts, mean cell volume (MCV) and platelet (PLT) counts were plotted for both groups. Healthy WT control mice are shown for comparison. The average spleen size and percent of *Trp53* shRNA<sup>+</sup> (GFP<sup>+</sup>) bone marrow cells was higher in ENU treated mice, reflective of the fact that most ENU-treated mice developed splenomegaly and had expansion of *Trp53* shRNA<sup>+</sup> malignant cells .

Bone marrow smear

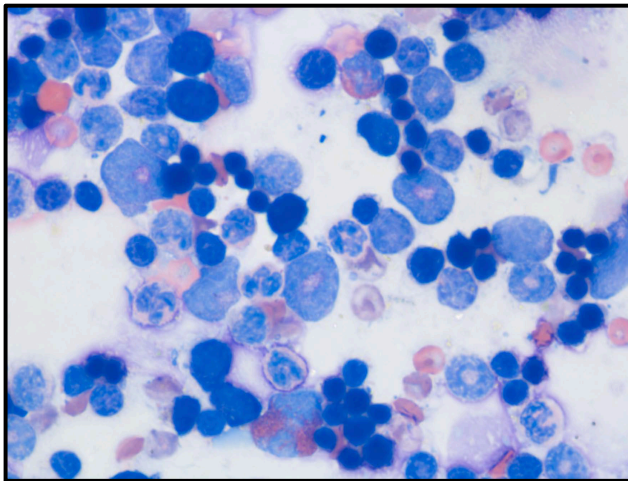

Bone core biopsy

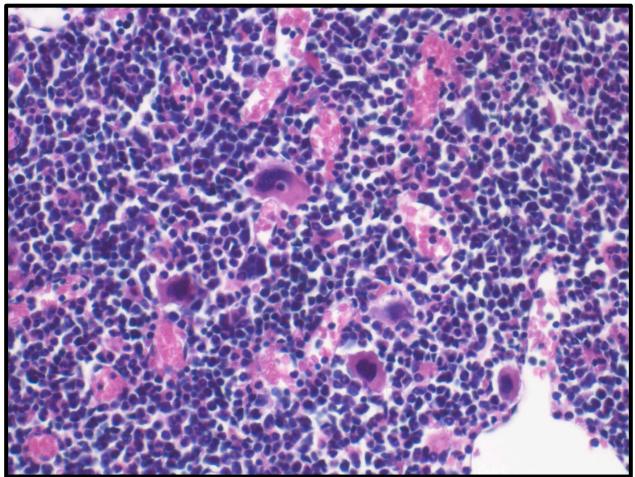

*Egr1*<sup>+/-</sup>, *Apc*<sup>del/+</sup>, *Trp53* shRNA → WT recipient (ENU-both)

Bone marrow smear

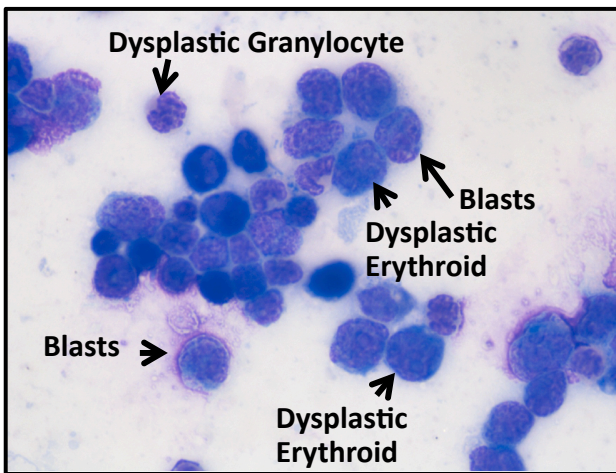

Bone core biopsy

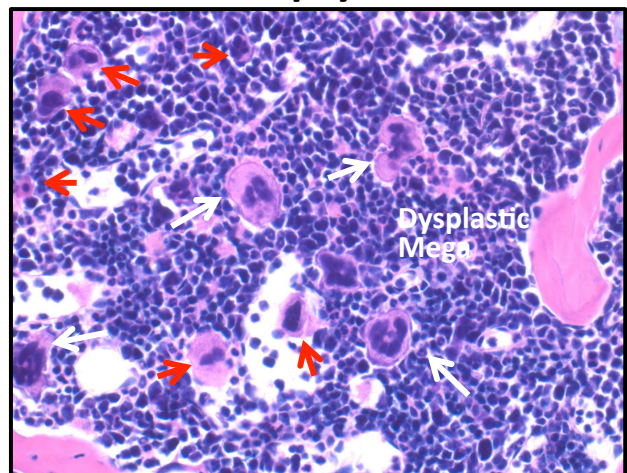

**Supplemental Figure 3. Mouse myeloid neoplasms with *Trp53* loss exhibit trilineage dysplasia.** An example of a WT recipient of *Egr1*<sup>+/-</sup>, *Apc*<sup>del/+</sup> bone marrow transduced with *Trp53* shRNA (ENU-both) that exhibits dysplasia of erythroid and myeloid cells, and megakaryocytes is shown. Blasts, dysplastic erythroid cells, granulocytes are shown in lower, left panel. Increased numbers of dysplastic megakaryocytes (mega), either large with atypically-shaped nuclei (white arrow) or small with hypolobated nuclei (red arrow) are shown in lower right panel. A WT control mouse is shown as a comparison. BM smears were stained with Wright–Giemsa (500x magnification), and BM core biopsies were stained with H&E (200x magnification).

**Pre-malignant change with EA, Trp53 loss  
ENU-exposed samples only**

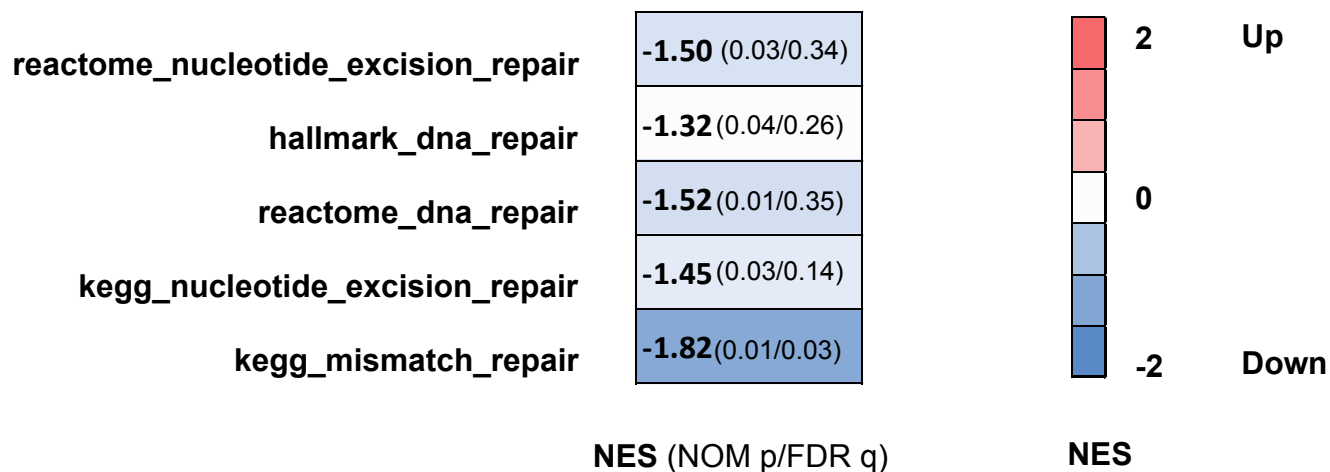

**Supplemental Figure 4. DNA repair signatures are downregulated in ENU-exposed EA-Trp53 LSK samples compared to WT control.** LSK<sup>+</sup> (Lin<sup>-</sup>, Sca1<sup>+</sup>, Kit<sup>+</sup>) cells were sorted from recipients of WT, luc shRNA<sup>+</sup> bone marrow (WT control) (n=3) or recipients of *Egr1*<sup>+/-</sup>, *Apc*<sup>del/+</sup>, *Trp53* shRNA<sup>+</sup> cells (EA-Trp53) treated with ENU (n=3), ~ 70-90 d after transplant, prior to overt leukemia. GSEA, comparing WT control (n=3) to ENU-treated EA-Trp53 LSK<sup>+</sup> (n=3) samples shows that DNA repair signatures are downregulated by loss of *Egr1*, *Apc*, and *Trp53* in LSK cells in ENU-treated conditions. Since DNA repair deficiency has been shown to stimulate ENU-induced mutagenesis (*Cancer Res.* 2003;63(9):2062-2066), this raises the possibility that deregulated DNA repair pathways may collaborate with ENU-mutagenesis to promote malignant transformation.

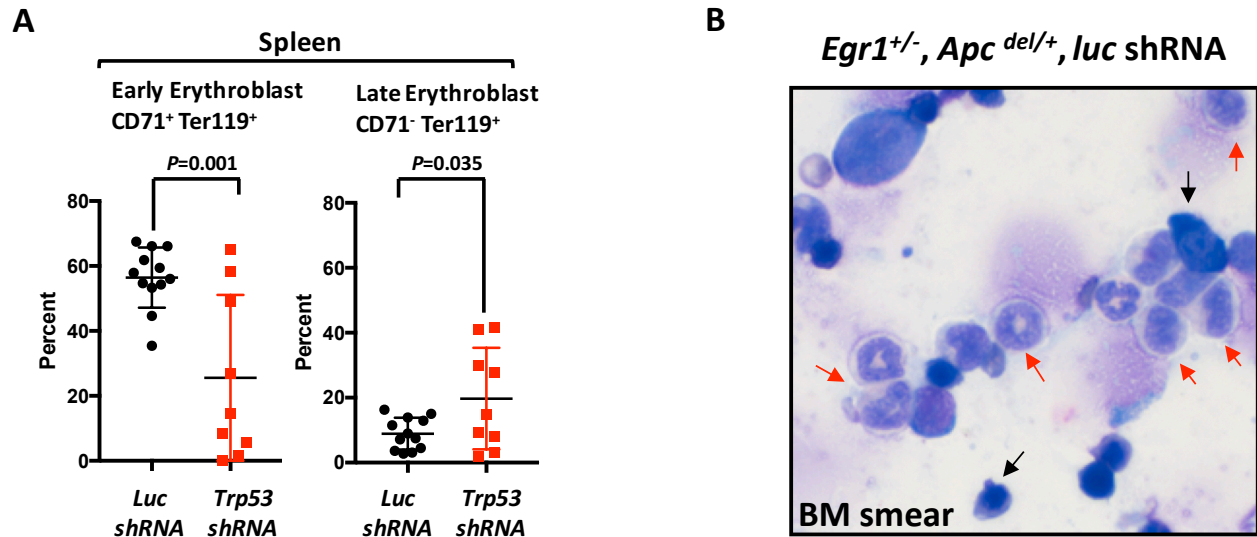

**Supplemental Figure 5. EA-luc mice model features of del(5q) t-MDS.** (A) The percent of early erythroblasts in spleen at the time of sacrifice shows massive erythroid expansion in *EA-luc* versus *EA-Trp53* mice consistent with MDS. The corollary is that EA *Trp53* mice show increased late erythroblasts. (B) An example of MDS developing in a *EA-luc* mouse is shown. Granulocytic dysplasia (red arrows) is manifested by abnormal nuclear segmentation and chromatin patterns as well as cytoplasmic hypogranulation. Dyserythropoietic features (black arrows) include binucleation and nuclear budding.

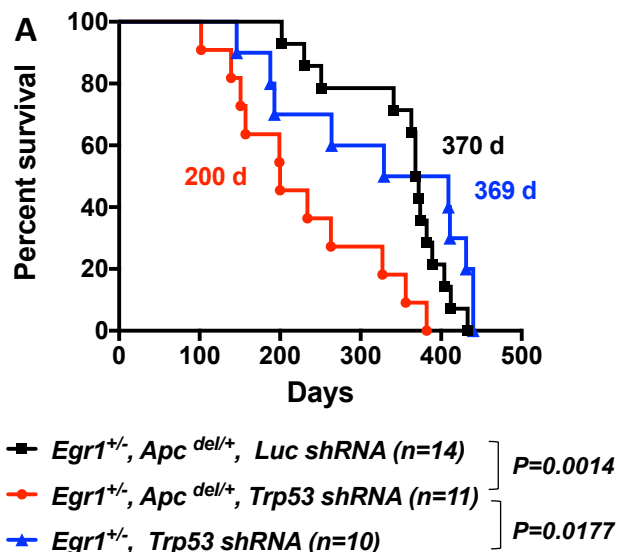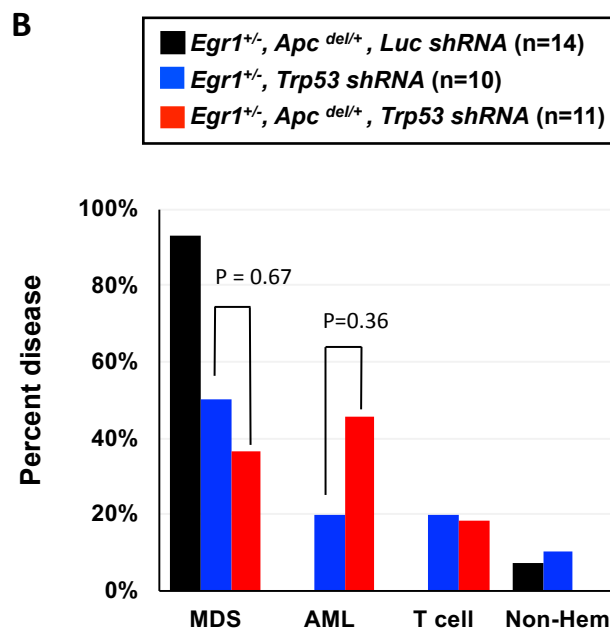

**Supplemental Figure 6. Development of myeloid disease is slower when only one del(5q) gene, *EGR1*, is haploinsufficient. (A)** Kaplan-Meier survival curves of WT recipients transplanted with *Egr1*<sup>+/-</sup>, *Apc*<sup>del/+</sup> bone marrow cells transduced with *luc shRNA* (*EA-luc*: black) or *Trp53 shRNA* (*EA-Trp53*: red), or *Egr1*<sup>+/-</sup> cells transduced with *Trp53 shRNA* (*E-Trp53*: blue). Both donor and recipient mice were treated with ENU. Disease development is significantly slower in *E-Trp53* mice compared to *EA-Trp53* mice (369d vs. 200d, P=0.0177) suggesting that the addition of *Apc* haploinsufficiency accelerates myeloid disease. **(B)** Histological classification of *E-Trp53* mice shows a trend towards more MDS and less AML compared to *EA-Trp53* mice.

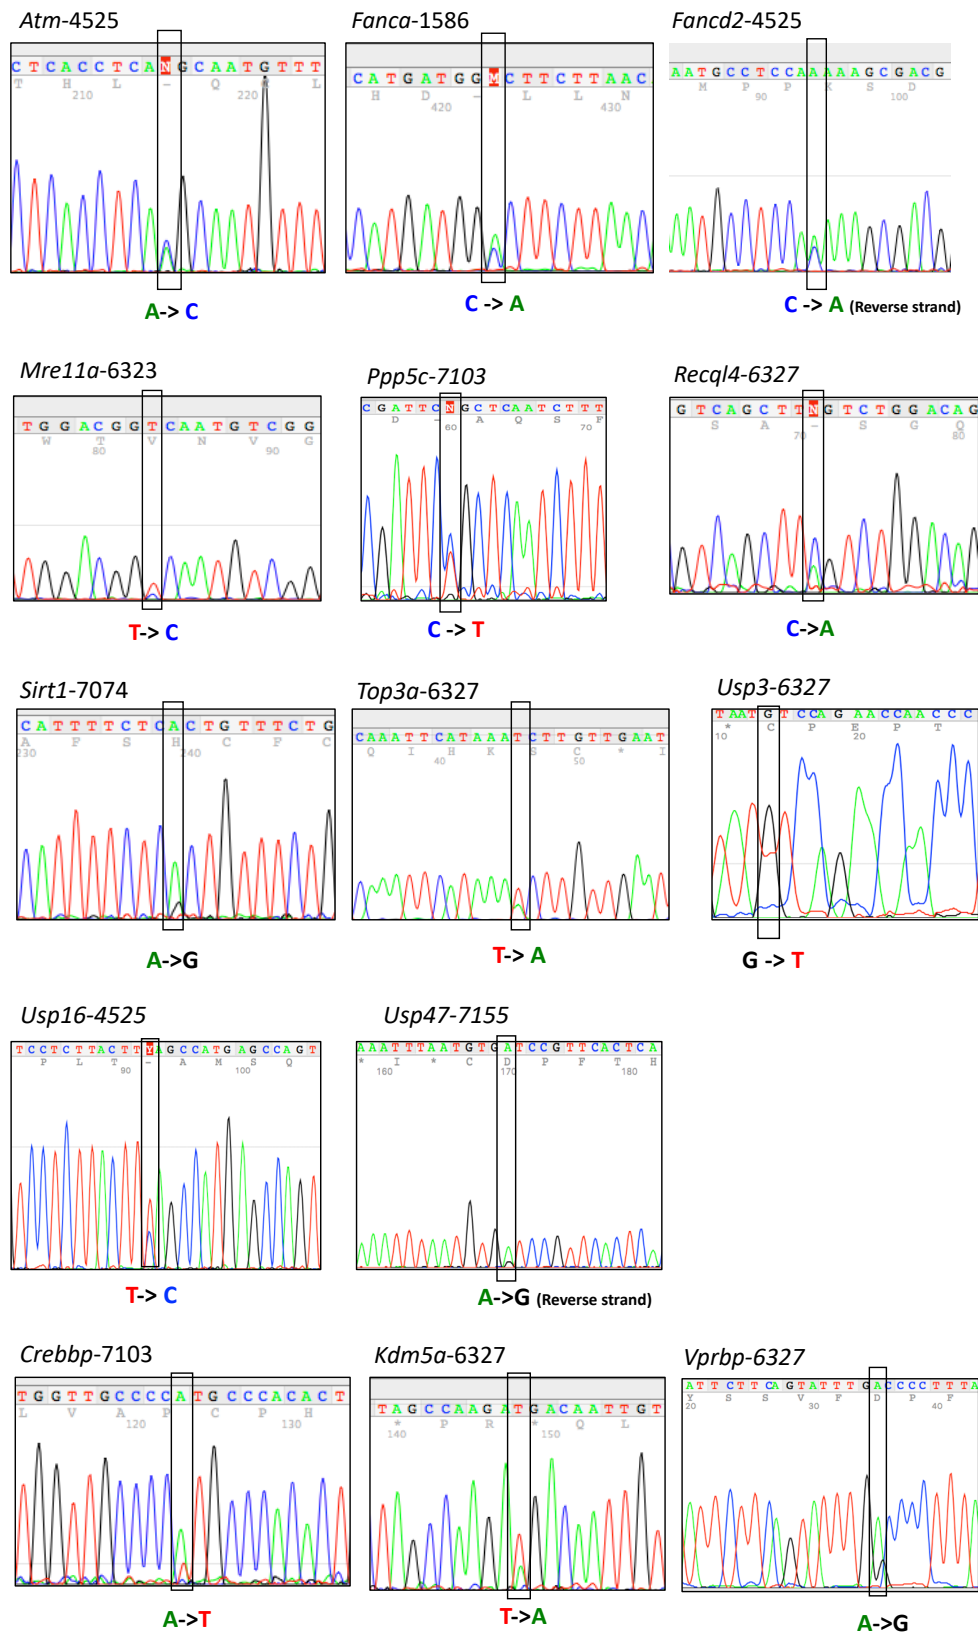

**Supplemental Figure 7. Sanger sequencing to validate mutations found by WES.** Sanger sequencing of both forward and reverse strands of myeloid neoplasms was performed. The forward strand (unless otherwise noted) with mutated base pair is highlighted with a black box. Key genes involved in the DDR and chromatin modification are shown.

**Supplemental Table S1.** List of primary MDS and AML mouse samples that were transplanted into secondary recipients

| Donor Phenotype*                                               | Donor Tag | Donor phenotype | No. Secondary Recipients | Disease transplantable (no. mice) | Days Disease free | 2nd MN <sup>§</sup> |
|----------------------------------------------------------------|-----------|-----------------|--------------------------|-----------------------------------|-------------------|---------------------|
| <b>Egr1<sup>+/-</sup>, Apc<sup>del/</sup><br/>+, Luc shRNA</b> | 7075      | MDS             | 5 mice                   | No                                | 343 d             | NA                  |
| <b>Egr1<sup>+/-</sup>, Apc<sup>del/</sup><br/>+, Luc shRNA</b> | 7073      | MDS             | 5 mice                   | No                                | 245 d             | NA                  |
| <b>Egr1<sup>+/-</sup>, Apc<sup>del/</sup><br/>+, Luc shRNA</b> | 7068      | MDS             | 5 mice                   | No                                | 245 d             | NA                  |
| <b>Egr1<sup>+/-</sup>,<br/>Luc shRNA</b>                       | 7022      | AML             | 2 mice                   | No                                | 244 d             | NA                  |
| <b>Egr1<sup>+/-</sup>, Apc<sup>del/</sup><br/>+, p53 shRNA</b> | 6323      | MDS             | 3 mice                   | No                                | 244 d             | NA                  |
| <b>Egr1<sup>+/-</sup>, Apc<sup>del/</sup><br/>+, p53 shRNA</b> | 7101      | AML             | 1 mouse                  | Yes (1/1)                         | NA                | 48 d                |
| <b>Egr1<sup>+/-</sup>, Apc<sup>del/</sup><br/>+, p53 shRNA</b> | 7103      | AML             | 6 mice                   | Yes (6/6)                         | NA                | 23-26 d             |
| <b>Egr1<sup>+/-</sup>, Apc<sup>del/</sup><br/>+, p53 shRNA</b> | 6327      | MDS             | 5 mice                   | No                                | 365 d             | NA                  |
| <b>Egr1<sup>+/-</sup>, Apc<sup>del/</sup><br/>+, p53 shRNA</b> | 7074      | AML             | 5 mice                   | Yes (3/5)                         | 390 d             | 190-329 d           |

\*All donor (phenotype shown) and recipient mice (WT) were ENU treated.

<sup>§</sup> Only mice that developed AML were transplantable into secondary recipients.



**Supplemental Table 2.** Spectral karyotype analysis of MDS and AML samples that underwent whole exome sequencing.

| Exome Group § | Tag number | Karyotype [no. cells]*                                                                                                                                                                                                                                                                                                                                                                                                                                                                                                                                                                                                                                                                                                                              | Clonal Abnormality** |
|---------------|------------|-----------------------------------------------------------------------------------------------------------------------------------------------------------------------------------------------------------------------------------------------------------------------------------------------------------------------------------------------------------------------------------------------------------------------------------------------------------------------------------------------------------------------------------------------------------------------------------------------------------------------------------------------------------------------------------------------------------------------------------------------------|----------------------|
| Luc shRNA     | 7068       | 40,XX[9]/40,XY[4]/41,XY,+mar[1]                                                                                                                                                                                                                                                                                                                                                                                                                                                                                                                                                                                                                                                                                                                     | no                   |
| Luc shRNA     | 7155       | 40,X,+X,der(X)inv(X)(A1B)t(X;13)(F1;A3),del(X)(A2F1),del(4)(D2E2),t(7;18)(E2;E3),-10,der(13)t(X;13)(F1;A3),der(19)t(10;19)(B5;D1)[6]/40,XY[12]                                                                                                                                                                                                                                                                                                                                                                                                                                                                                                                                                                                                      | yes                  |
| Luc shRNA     | 7075       | 40,XY[17]/80,XXYY[1]/40,XX[1]/40,XY,der(5)t(5;5)(A1;E5)[1]                                                                                                                                                                                                                                                                                                                                                                                                                                                                                                                                                                                                                                                                                          | no                   |
| Luc shRNA     | 7134       | 40,XX[19]/40,XY[1]/39,XX,t(7;10;13;10)(D3;B4;D2;D2),dup(12)(A1B),-19[1]                                                                                                                                                                                                                                                                                                                                                                                                                                                                                                                                                                                                                                                                             | no                   |
| Luc shRNA     | 7073       | 40,XY[19]/40,XY,del(12)(A2F2)[1]/34,XY,-7,-8,-11,del(13)(A2C2),-16,-18,-19[1]                                                                                                                                                                                                                                                                                                                                                                                                                                                                                                                                                                                                                                                                       | no                   |
| Luc shRNA     | 7066       | 40,XX[2]/40,XY[17]/39,XX,t(4;14)(A1;D3),-17[1]                                                                                                                                                                                                                                                                                                                                                                                                                                                                                                                                                                                                                                                                                                      | no                   |
| Luc shRNA     | 7067       | 40,XX,del(6)(A2D)[2]/40,XY,trp(5)(A1B)[2]/40,XX[8]/40,XY[7]/40,XX,del(3)(A2D)[1]                                                                                                                                                                                                                                                                                                                                                                                                                                                                                                                                                                                                                                                                    | yes                  |
| p53 shRNA     | 1586†      | 40,XX,t(7;17)(F1;D)[8]/40,XX,der(2)t(X;2)(D;D)[1]/40,XX[1]                                                                                                                                                                                                                                                                                                                                                                                                                                                                                                                                                                                                                                                                                          | yes                  |
| p53 shRNA     | 4525†      | 56,XX,+X,+1,+2,del(3)(BF1),+4,+4,+5,+5,+6,+6,del(6)(B3G3),t(6;12)(D;F1),+10,+11,+14,+15,+16,+17,+19[7]/58,idem,+14,+15[1]/40,XX[3]/40,XY[1]                                                                                                                                                                                                                                                                                                                                                                                                                                                                                                                                                                                                         | yes                  |
| p53 shRNA     | 7914‡      | 40,XY[21]                                                                                                                                                                                                                                                                                                                                                                                                                                                                                                                                                                                                                                                                                                                                           | no                   |
| p53 shRNA     | 6323       | 39,XY,-13[4]/40,XY[16]                                                                                                                                                                                                                                                                                                                                                                                                                                                                                                                                                                                                                                                                                                                              | yes                  |
| p53 shRNA     | 6327       | 40,XY[2]/40,XX[4]/39,X,-X or 39,X,-Y[4]/41,XX,+8[1]/42,XX,+2,+4,+8,-16,-18,+mar[1]/37,X,-X,-11,del(13)(A5D2),-17 or 37,X,-Y,-11,del(13)(A5D2),-17[1]                                                                                                                                                                                                                                                                                                                                                                                                                                                                                                                                                                                                | yes                  |
| p53 shRNA     | 7074       | 40,XX[5]/40,XY[9]                                                                                                                                                                                                                                                                                                                                                                                                                                                                                                                                                                                                                                                                                                                                   | no                   |
| p53 shRNA     | 7101       | 59,X,der(X)t(X;5)(A2;B),+1,+2,+3,+4,+6,+der(7)t(7;15)(B5;C),+9,+der(10)t(3;10)(F1;C1),+11,+11,+12,+14,+14,del(14)(D2E2),+15,+16,+17,+18,+19,+mar[6]/59,idem,del(16)(B1B3)[4]/58,idem,t(3;5)(G;E5),-der(10)t(3;10),del(16)(B1B3)[3]/60,idem,+9,der(9)t(4;9)(C4;F1)[1]/57,idem,t(2;3)(H1;H1),der(3)t(2;3)(H1;H1),-der(10)t(3;10),der(10)t(5;10)(F;E3),-19[1]/56,idem,-3,+der(4)t(4;11)(C4;B5),-6,-der(10)t(3;10),+der(10)t(5;10)(F;E3),-15,-19[1]/57,idem,dic(X;15)(A1;A1)der(X)t(X;5),-3,-9,+10,-11,-15,+17,+18,del(18)(CE3),der(18)t(15;18)(C;D)[1]/56,idem,+der dic(2;8)(A1;A1)del(8)(A2E1),-3,+10,-11,-11,-del(14)(D2E2),-17[1]/55,idem,+der(X)t(X;15)(C;C),-3,-9,t(9;18)(F1;D),-der(10)t(3;10),+10,-11,der(11)t(8;11)(C3;D),-15,-mar[1]/40,XY[1] | yes                  |
| p53 shRNA     | 7103       | 41,XY,+1[15]/40,XX,t(2;16)(E2;B5),+5,del(5)(E3F),-6[2]/40,XY[3]                                                                                                                                                                                                                                                                                                                                                                                                                                                                                                                                                                                                                                                                                     | yes                  |

§ Donor mice were *Egr1*<sup>+/-</sup>, *Apc*<sup>del/+</sup> and recipient mice were WT (C57Bl/6). shRNA used to transduce bone marrow cells is shown. Both donor and recipient mice were ENU-treated; exceptions are listed († and ‡).

\*A minimum of 10 metaphase cells were analyzed.

\*\*2/7 (29%) Luc-shRNA and 6/8 (75%) p53-shRNA mice had a clonal karyotypic abnormality.

† Donor and recipient mice were not ENU treated.

‡ Only the recipient mouse was ENU treated.

**Supplemental Table 3.** List of mutations identified by whole exome sequencing analysis in bone marrow isolated from *EA-Luc* MDS and *EA-Trp53* AML samples.

| Mouse Tag | Mutation Type | UCSC mm9  | Chromosome | Reference | Mutation          | Gene            | NCBI Reference | Transcript position | Amino acid position | GERP Score | Amino acid change | Expressed in MN (SRA061655) |
|-----------|---------------|-----------|------------|-----------|-------------------|-----------------|----------------|---------------------|---------------------|------------|-------------------|-----------------------------|
| 7068-luc  | missense      | 107244898 | chr9       | T         | C                 | 6430571L13Rik   | NM_175486      | 617                 | 73                  | 3.35       | V73A              | No                          |
| 7068-luc  | missense      | 111506097 | chr7       | A         | C                 | A530023O14Rik   | NM_175648      | 585                 | 22                  | 2.45       | L22R              | No                          |
| 7068-luc  | missense      | 76658499  | chr5       | A         | T                 | <i>Clock</i>    | NM_007715      | 2364                | 659                 | 2.37       | N659K             | Yes                         |
| 7068-luc  | missense      | 62990910  | chr4       | A         | T                 | <i>Col27a1</i>  | NM_025685      | 5555                | 1714                | 3.6        | Q1714L            | Yes                         |
| 7068-luc  | missense      | 120868629 | chr9       | C         | G                 | <i>Ctnnb1</i>   | NM_007614      | 2552                | 780                 | 3.92       | D780E             | Yes                         |
| 7068-luc  | missense      | 105934937 | chr12      | A         | G                 | <i>Dicer1</i>   | NM_148948      | 4872                | 1532                | 3.97       | Y1532H            | Yes                         |
| 7068-luc  | missense      | 63773233  | chr16      | C         | A                 | <i>Epha3</i>    | NM_010140      | 426                 | 106                 | 3.01       | C106F             | Yes                         |
| 7068-luc  | missense      | 118363937 | chr14      | A         | T                 | <i>Gpc6</i>     | NM_001079844   | 1957                | 446                 | 3.52       | M446L             | Yes                         |
| 7068-luc  | missense      | 135509836 | chr4       | T         | G                 | <i>Hmgcl</i>    | NM_008254      | 345                 | 106                 | 3.69       | L106R             | Yes                         |
| 7068-luc  | missense      | 80129331  | chr9       | T         | C                 | <i>Myo6</i>     | NM_001039546   | 2356                | 714                 | 3.87       | L714P             | Yes                         |
| 7068-luc  | missense      | 13490804  | chr12      | T         | A                 | <i>Nbas</i>     | NM_027706      | 5657                | 1878                | 3.55       | I1878N            | Yes                         |
| 7068-luc  | missense      | 97103330  | chr11      | T         | A                 | <i>Npepps</i>   | NM_008942      | 1001                | 295                 | 3.97       | D295V             | Yes                         |
| 7068-luc  | missense      | 49325855  | chr8       | G         | A                 | <i>Odz3</i>     | NM_011857      | 5441                | 1798                | 2.51       | T1798I            | Yes                         |
| 7068-luc  | missense      | 115959430 | chr4       | T         | C                 | <i>Pik3r3</i>   | NM_181585      | 1161                | 256                 | 3.46       | I256T             | Yes                         |
| 7068-luc  | missense      | 108762980 | chr9       | T         | A                 | <i>Slc26a6</i>  | NM_134420      | 2419                | 527                 | 3.17       | L527Q             | Yes                         |
| 7068-luc  | missense      | 14321856  | chr2       | A         | T                 | <i>Slc39a12</i> | NM_001012305   | 809                 | 211                 | 2.81       | I211F             | Yes                         |
| 7068-luc  | missense      | 42175010  | chr9       | C         | A                 | <i>Tecta</i>    | NM_009347      | 3550                | 1095                | 3.85       | R1095L            | Yes                         |
| 7068-luc  | missense      | 45140621  | chr9       | C         | T                 | <i>Tmprss13</i> | NM_001013373   | 606                 | 191                 | 3.6        | R191C             | Yes                         |
| 7068-luc  | missense      | 37556701  | chr7       | C         | A                 | <i>Tshz3</i>    | NM_172298      | 3227                | 1032                | 3.85       | S1032Y            | Yes                         |
| 7068-luc  | missense      | 20608472  | chr17      | A         | T                 | <i>Vmn2r108</i> | NM_001104570   | 751                 | 251                 | 2.17       | I251N             | No                          |
| 7068-luc  | nonsense      | 66797755  | chrX       | C         | T                 | <i>Aff2</i>     | NM_008032      | 813                 | 118                 | NA         | Q118*             | Yes                         |
| 7068-luc  | nonsense      | 120268270 | chr14      | G         | A                 | <i>Hs6st3</i>   | NM_015820      | 1017                | 289                 | NA         | W289*             | Yes                         |
| 7068-luc  | nonsense      | 31135122  | chr17      | C         | T                 | <i>Umod1</i>    | NM_177465      | 3447                | 1128                | NA         | Q1128*            | Yes                         |
| 7068-luc  | nonsense      | 109481186 | chr5       | A         | T                 | <i>Vmn2r11</i>  | NM_001104622   | 1418                | 473                 | NA         | Y473*             | No                          |
| 7155-luc  | missense      | 83133776  | chrX       | A         | C                 | 5430427O19Rik   | NM_001163539   | 773                 | 203                 | 2.8        | K203T             | No                          |
| 7155-luc  | missense      | 69162014  | chr2       | A         | T                 | <i>Abcb11</i>   | NM_021022      | 390                 | 88                  | 2.49       | D88E              | Yes                         |
| 7155-luc  | missense      | 56797067  | chr19      | T         | G                 | <i>Adrb1</i>    | NM_007419      | 206                 | 69                  | 2.79       | V69G              | Yes                         |
| 7155-luc  | missense      | 58433499  | chr16      | T         | G                 | <i>Dcbld2</i>   | NM_028523      | 706                 | 162                 | 3.47       | V162G             | Yes                         |
| 7155-luc  | missense      | 60536895  | chr11      | A         | G                 | <i>Flii</i>     | NM_022009      | 330                 | 100                 | 3.7        | I100T             | Yes                         |
| 7155-luc  | missense      | 108146876 | chr5       | G         | C                 | <i>Gfi1</i>     | NM_010278      | 1660                | 386                 | 3.73       | P386A             | Yes                         |
| 7155-luc  | missense      | 118005354 | chr5       | T         | A                 | <i>Ksr2</i>     | NM_001034873   | 1686                | 286                 | 2.49       | L286Q             | Yes                         |
| 7155-luc  | missense      | 68909449  | chr2       | T         | C                 | <i>Lass6</i>    | NM_172856      | 878                 | 267                 | 3.94       | F267L             | Yes                         |
| 7155-luc  | missense      | 193584028 | chr1       | T         | C                 | <i>Lpgat1</i>   | NM_172266      | 838                 | 210                 | 3.97       | V210A             | Yes                         |
| 7155-luc  | missense      | 75008277  | chr9       | C         | A                 | <i>Myo5a</i>    | NM_010864      | 2232                | 602                 | 3.48       | T602N             | Yes                         |
| 7155-luc  | missense      | 25353364  | chr3       | T         | A                 | <i>Nlgn1</i>    | NM_138666      | 2420                | 374                 | 3.72       | I374L             | Yes                         |
| 7155-luc  | missense      | 119196810 | chr7       | T         | C                 | <i>Usp47</i>    | NM_133758      | 321                 | 40                  | 3.48       | I40T              | Yes                         |
| 7134-luc  | missense      | 109002644 | chr9       | T         | C                 | <i>Plxn1</i>    | NM_172775      | 322                 | 18                  | 2.13       | V18A              | Yes                         |
| 7073-luc  | missense      | 53746221  | chrX       | T         | G                 | <i>Ddx26b</i>   | NM_172779      | 1527                | 400                 | 3.31       | L400V             | Yes                         |
| 7073-luc  | missense      | 113750443 | chr13      | A         | G                 | <i>Dhx29</i>    | NM_172594      | 2978                | 993                 | 3.74       | Y993C             | Yes                         |
| 7073-luc  | missense      | 34285625  | chr1       | T         | A                 | <i>Dst</i>      | NM_134448      | 15302               | 5101                | 3.94       | L5101H            | Yes                         |
| 7073-luc  | missense      | 88988568  | chr3       | T         | C                 | <i>Fam189b</i>  | NM_001014995   | 909                 | 137                 | 2.29       | V137A             | Yes                         |
| 7073-luc  | missense      | 44149507  | chr5       | A         | T                 | <i>Fbx15</i>    | NM_178729      | 1901                | 601                 | 3.69       | F601I             | Yes                         |
| 7073-luc  | missense      | 126689230 | chr6       | A         | C                 | <i>Kcna6</i>    | NM_013568      | 1462                | 238                 | 3.01       | I238S             | Yes                         |
| 7073-luc  | missense      | 6382003   | chr7       | T         | C                 | LOC100042450    | NM_001134752   | 396                 | 78                  | 2.24       | W78R              | No                          |
| 7073-luc  | missense      | 69305107  | chr2       | T         | A                 | <i>Lrp2</i>     | NM_001081088   | 9739                | 3189                | 4.07       | D3189V            | Yes                         |
| 7073-luc  | missense      | 60202473  | chr12      | T         | A                 | <i>Mia2</i>     | NM_177321      | 131                 | 44                  | 2.24       | V44D              | Yes                         |
| 7073-luc  | missense      | 68552848  | chrX       | T         | A                 | <i>Mtm1</i>     | NM_019926      | 1233                | 387                 | 2.19       | S387T             | Yes                         |
| 7073-luc  | missense      | 75143932  | chr9       | T         | C                 | <i>Myo5c</i>    | NM_001081322   | 4637                | 1501                | 3.86       | I1501T            | Yes                         |
| 7073-luc  | missense      | 179992347 | chr2       | C         | G                 | <i>Rps21</i>    | NM_025587      | 91                  | 3                   | 2.9        | N3K               | Yes                         |
| 7073-luc  | missense      | 117177913 | chr10      | A         | G                 | <i>Slc35e3</i>  | NM_029875      | 739                 | 190                 | 3.94       | Y190H             | Yes                         |
| 7073-luc  | missense      | 8049996   | chr10      | A         | G                 | <i>Ust</i>      | NM_177387      | 745                 | 107                 | 3.62       | V107A             | Yes                         |
| 7073-luc  | missense      | 18940660  | chr8       | A         | G                 | <i>Xkr5</i>     | NM_001113350   | 629                 | 197                 | 2.95       | L197P             | Yes                         |
| 7073-luc  | missense      | 46388601  | chr17      | C         | G                 | <i>Yipf3</i>    | NM_145353      | 1150                | 328                 | 3.67       | L328V             | Yes                         |
| 7066-luc  | missense      | 35262026  | chr9       | A         | T                 | <i>Cdon</i>     | NM_021339      | 514                 | 162                 | 2.6        | H162L             | Yes                         |
| 7066-luc  | missense      | 12887711  | chr10      | T         | A                 | <i>Fam164b</i>  | NM_029172      | 282                 | 82                  | 3.64       | Q82L              | Yes                         |
| 7066-luc  | missense      | 154534063 | chr4       | A         | T                 | <i>Ski</i>      | NM_011385      | 1227                | 405                 | 3.51       | Y405N             | Yes                         |
| 7066-luc  | missense      | 4265629   | chr19      | T         | C                 | <i>Ssh3</i>     | NM_198113      | 948                 | 286                 | 2.79       | D286G             | Yes                         |
| 7066-luc  | missense      | 5752992   | chr17      | C         | G                 | <i>Zdhhc14</i>  | NM_146073      | 2216                | 457                 | 3.01       | P457A             | Yes                         |
| 7066-luc  | nonsense      | 76334802  | chr15      | G         | A                 | <i>Dgat1</i>    | NM_010046      | 508                 | 158                 | NA         | Q158*             | Yes                         |
| 7066-luc  | nonsense      | 61596851  | chr10      | T         | A                 | <i>Neurog3</i>  | NM_009719      | 880                 | 214                 | NA         | L214*             | Yes                         |
| 7067-luc  | missense      | 99432100  | chr15      | G         | T                 | <i>Aqp6</i>     | NM_175087      | 270                 | 88                  | 3.63       | V88L              | Yes                         |
| 7067-luc  | missense      | 97459014  | chr8       | T         | A                 | <i>Gpr114</i>   | NM_001033468   | 564                 | 161                 | 3.13       | V161E             | Yes                         |
| 7067-luc  | missense      | 166425568 | chrX       | G         | A                 | <i>Mid1</i>     | NM_010797      | 1746                | 522                 | 3.63       | D522N             | Yes                         |
| 7067-luc  | missense      | 35177749  | chr6       | A         | G                 | <i>Nup205</i>   | NM_027513      | 4332                | 1439                | 3.59       | D1439G            | Yes                         |
| 7067-luc  | missense      | 170115152 | chr1       | T         | C                 | <i>Pbx1</i>     | NM_183355      | 1798                | 349                 | 2.63       | S349G             | Yes                         |
| 7067-luc  | missense      | 59757737  | chr10      | T         | G                 | <i>Psap</i>     | NM_011179      | 713                 | 200                 | 3.74       | C200G             | Yes                         |
| 7067-luc  | missense      | 105500806 | chr7       | A         | G                 | <i>Tsku</i>     | NM_001024619   | 881                 | 276                 | 3.22       | F276S             | Yes                         |
| 7067-luc  | missense      | 166881631 | chr2       | A         | C                 | <i>Znfx1</i>    | NM_001033196   | 1427                | 291                 | 3.94       | V291G             | Yes                         |
| 1586-p53  | missense      | 125820249 | chr8       | C         | A                 | <i>Fanca</i>    | NM_016925      | 1670                | 550                 | 3.01       | A550S             | Yes                         |
| 1586-p53  | missense      | 25547154  | chr4       | A         | G                 | <i>Fut9</i>     | NM_010243      | 1315                | 269                 | 3.74       | V269A             | Yes                         |
| 1586-p53  | missense      | 94385174  | chr15      | A         | G                 | <i>Irak4</i>    | NM_029926      | 662                 | 183                 | 3.52       | Q183R             | Yes                         |
| 1586-p53  | missense      | 45704170  | chr17      | G         | A                 | <i>Slc35b2</i>  | NM_028662      | 1690                | 376                 | 2.65       | E376K             | Yes                         |
| 1586-p53  | nonsense      | 132341136 | chr4       | G         | A                 | BC013712        | NM_001033308   | 1703                | 565                 | NA         | Q565*             | No                          |
| 1586-p53  | indel         | 87247594  | chr3       | GTTC      | G                 | <i>Fcrl5</i>    | NM_001113238   | 327                 | NA                  | NA         | deletion          | Yes                         |
| 1586-p53  | indel         | 37024741  | chr3       | A         | AGCTTGAA<br>GTGGG | <i>Il2</i>      | NM_008366      | 134                 | NA                  | NA         | insertion         | No                          |
| 1586-p53  | indel         | 41545949  | chr3       | AT        | A                 | <i>Sclt1</i>    | NM_001081411   | 487                 | NA                  | NA         | deletion          | Yes                         |

|          |          |           |       |   |          |                 |              |       |      |      |           |     |
|----------|----------|-----------|-------|---|----------|-----------------|--------------|-------|------|------|-----------|-----|
| 4525-p53 | missense | 7217906   | chr18 | C | T        | <i>Armc4</i>    | NM_001081393 | 1946  | 602  | 3.59 | R602Q     | Yes |
| 4525-p53 | missense | 53307231  | chr9  | A | C        | <i>Atn</i>      | NM_007499    | 3293  | 1052 | 3.77 | L1052R    | Yes |
| 4525-p53 | missense | 85205829  | chr15 | G | A        | <i>Atxn10</i>   | NM_016843    | 553   | 157  | 3.51 | A157T     | Yes |
| 4525-p53 | missense | 113537391 | chr6  | G | T        | <i>Fancd2</i>   | NM_001033244 | 3996  | 1300 | 3.66 | V1300L    | Yes |
| 4525-p53 | missense | 125141176 | chr2  | G | A        | <i>Fbn1</i>     | NM_007993    | 7207  | 2308 | 3.82 | R2308C    | Yes |
| 4525-p53 | missense | 56921699  | chr12 | T | C        | <i>Garn1</i>    | NM_001003719 | 455   | 19   | 3.18 | D19G      | Yes |
| 4525-p53 | missense | 44351292  | chr15 | T | C        | <i>Pkhd11</i>   | NM_138674    | 3400  | 1134 | 3.87 | S1134P    | Yes |
| 4525-p53 | missense | 11079811  | chr1  | G | A        | <i>Prex2</i>    | NM_029525    | 861   | 178  | 4.07 | R178Q     | Yes |
| 4525-p53 | missense | 34089002  | chr17 | A | G        | <i>Rps18</i>    | NM_011296    | 465   | 149  | 2.69 | S149P     | Yes |
| 4525-p53 | missense | 74672377  | chr11 | C | T        | <i>Sgsm2</i>    | NM_197943    | 1691  | 498  | 3.63 | R498Q     | Yes |
| 4525-p53 | missense | 31829984  | chr5  | C | T        | <i>Slc4a1ap</i> | NM_009206    | 617   | 197  | 2.77 | P197L     | Yes |
| 4525-p53 | missense | 87472000  | chr16 | T | C        | <i>Usp16</i>    | NM_024258    | 932   | 258  | 2.71 | L258S     | Yes |
| 4525-p53 | missense | 115773823 | chr7  | A | C        | <i>Olfr508</i>  | NM_146773    | 316   | 106  | 2.31 | T106P     | No  |
| 4525-p53 | missense | 115811700 | chr7  | A | G        | <i>Olfr510</i>  | NM_146311    | 769   | 257  | 2.59 | T257A     | No  |
| 4525-p53 | missense | 38823883  | chr19 | T | C        | <i>P1ce1</i>    | NM_019588    | 4902  | 1614 | 2.23 | S1614P    | Yes |
| 4525-p53 | nonsense | 112078884 | chr14 | C | A        | <i>Slitrk5</i>  | NM_198865    | 1334  | 239  | NA   | C239*     | Yes |
| 4525-p53 | indel    | 31236148  | chr5  | T | TTTC     | <i>Cgref1</i>   | NM_001160149 | 614   | NA   | NA   | insertion | Yes |
| 4525-p53 | indel    | 57596182  | chr6  | T | TTGATGCA | <i>Herc5</i>    | NM_025992    | 1820  | NA   | NA   | insertion | Yes |
| 4525-p53 | indel    | 19141505  | chr8  | A | AC       | <i>Spag11b</i>  | NM_001034905 | 235   | NA   | NA   | insertion | No  |
| 7914-p53 | missense | 120266615 | chr13 | C | A        | 4833420G17Rik   | NM_001113550 | 1905  | 484  | 3.81 | T484K     | No  |
| 7914-p53 | missense | 110149834 | chr9  | C | T        | <i>Cspg5</i>    | NM_013884    | 1280  | 378  | 3.17 | P378L     | Yes |
| 7914-p53 | missense | 76024552  | chr11 | G | C        | <i>Gemin4</i>   | NM_177367    | 2908  | 962  | 3.84 | P962A     | Yes |
| 7914-p53 | missense | 69864651  | chr9  | C | T        | <i>Gtf2a2</i>   | NM_001039519 | 257   | 33   | 3.85 | A33V      | Yes |
| 7914-p53 | missense | 52853453  | chr18 | G | T        | <i>Gyk1</i>     | NM_010293    | 110   | 26   | 2.54 | L26F      | No  |
| 7914-p53 | missense | 65217552  | chr1  | C | T        | <i>ldh1</i>     | NM_010497    | 563   | 132  | 2.55 | R132Q     | Yes |
| 7914-p53 | missense | 78353536  | chr11 | G | A        | <i>lft20</i>    | NM_018854    | 574   | 68   | 3.67 | E68K      | Yes |
| 7914-p53 | missense | 105227801 | chr7  | C | T        | <i>Myo7a</i>    | NM_008663    | 2766  | 836  | 3.77 | R836H     | Yes |
| 7914-p53 | missense | 86603220  | chr7  | G | A        | <i>Polg</i>     | NM_017462    | 2095  | 578  | 3.17 | R578W     | Yes |
| 7914-p53 | missense | 20594442  | chr16 | C | T        | <i>Vwa5b2</i>   | NM_182636    | 988   | 167  | 2.91 | S167F     | Yes |
| 7914-p53 | nonsense | 4309343   | chr9  | C | A        | <i>Aashhpt</i>  | NM_026276    | 151   | 32   | NA   | E32*      | Yes |
| 7914-p53 | nonsense | 85780699  | chr6  | G | A        | <i>Cml4</i>     | NM_023455    | 613   | 149  | NA   | R149*     | Yes |
| 7914-p53 | nonsense | 42198073  | chr10 | C | T        | <i>Lace1</i>    | NM_145743    | 298   | 45   | NA   | W45*      | Yes |
| 6323-p53 | missense | 45653867  | chr17 | A | T        | <i>Aars2</i>    | NM_198608    | 1675  | 554  | 3.59 | L554F     | Yes |
| 6323-p53 | missense | 10509326  | chr18 | C | T        | AK220484        | NM_001083628 | 1860  | 547  | 3.18 | H547Y     | No  |
| 6323-p53 | missense | 31370522  | chr5  | T | C        | <i>Cad</i>      | NM_023525    | 3080  | 979  | 3.49 | V979A     | Yes |
| 6323-p53 | missense | 80186792  | chr2  | T | C        | <i>Dnajc10</i>  | NM_024181    | 2420  | 645  | 2.23 | Y645H     | Yes |
| 6323-p53 | missense | 106268515 | chr11 | A | T        | <i>Ern1</i>     | NM_023913    | 2212  | 698  | 3.32 | M698K     | Yes |
| 6323-p53 | missense | 80665688  | chr3  | A | T        | <i>Glrh</i>     | NM_010298    | 683   | 183  | 3.48 | C183S     | Yes |
| 6323-p53 | missense | 83993227  | chrX  | A | T        | <i>l11rap1</i>  | NM_001160403 | 2092  | 482  | 4.07 | V482E     | Yes |
| 6323-p53 | missense | 99877454  | chr11 | T | A        | <i>Krt33a</i>   | NM_027983    | 72    | 3    | 3.79 | Y3F       | Yes |
| 6323-p53 | missense | 14601550  | chr9  | T | C        | <i>Mre11a</i>   | NM_018736    | 595   | 156  | 3.49 | S156P     | Yes |
| 6323-p53 | missense | 47439140  | chr19 | C | A        | <i>Sh3pxd2a</i> | NM_008018    | 646   | 124  | 3.14 | R124L     | Yes |
| 6323-p53 | missense | 37291145  | chr16 | T | G        | <i>Stxbp5l</i>  | NM_001114611 | 628   | 158  | 3.50 | T158P     | Yes |
| 6323-p53 | missense | 104343017 | chr12 | A | C        | <i>Unc99</i>    | NM_001081017 | 3422  | 1141 | 3.85 | Y1141S    | No  |
| 6327-p53 | missense | 54818172  | chr11 | C | T        | <i>Anxa6</i>    | NM_013472    | 871   | 245  | 3.23 | V245M     | Yes |
| 6327-p53 | missense | 94710459  | chr13 | G | A        | <i>Arsb</i>     | NM_009712    | 1477  | 460  | 2.54 | V460I     | Yes |
| 6327-p53 | missense | 29718539  | chr14 | T | A        | <i>Cacna2d3</i> | NM_009785    | 3284  | 1063 | 3.37 | N1063I    | Yes |
| 6327-p53 | missense | 18096848  | chr9  | T | G        | <i>Chordc1</i>  | NM_025844    | 138   | 3    | 2.46 | L3R       | Yes |
| 6327-p53 | missense | 40238859  | chr19 | T | C        | <i>Cyp2c70</i>  | NM_145499    | 949   | 314  | 2.33 | K314R     | No  |
| 6327-p53 | missense | 138193490 | chr7  | T | A        | <i>Dmbt1</i>    | NM_007769    | 611   | 201  | 3.08 | I201N     | Yes |
| 6327-p53 | missense | 118602238 | chr3  | G | A        | <i>Dpyd</i>     | NM_170778    | 1210  | 371  | 4.07 | R371Q     | Yes |
| 6327-p53 | missense | 108778831 | chr6  | T | A        | <i>Edem1</i>    | NM_138677    | 197   | 33   | 2.83 | F33Y      | Yes |
| 6327-p53 | missense | 75733955  | chr15 | A | G        | <i>Eef1d</i>    | NM_029663    | 394   | 95   | 2.15 | I95T      | Yes |
| 6327-p53 | missense | 125027119 | chr5  | A | C        | <i>Eif2b1</i>   | NM_145371    | 201   | 53   | 3.44 | I53R      | Yes |
| 6327-p53 | missense | 34039906  | chr18 | G | T        | <i>Epb4.11a</i> | NM_013512    | 1144  | 123  | 2.66 | A123D     | Yes |
| 6327-p53 | missense | 55096159  | chr11 | T | C        | <i>Fat2</i>     | NM_001029988 | 7239  | 2410 | 3.87 | D2410G    | Yes |
| 6327-p53 | missense | 29400619  | chr6  | T | C        | <i>Finc</i>     | NM_001081185 | 4651  | 1449 | 3.72 | C1449R    | Yes |
| 6327-p53 | missense | 88862329  | chr17 | T | A        | <i>Foxn2</i>    | NM_180974    | 450   | 88   | 3.49 | I88K      | Yes |
| 6327-p53 | missense | 97198660  | chr5  | G | A        | <i>Fras1</i>    | NM_175473    | 11377 | 3507 | 3.55 | V3507I    | Yes |
| 6327-p53 | missense | 64677254  | chr7  | C | A        | <i>Gabra5</i>   | NM_176942    | 926   | 195  | 3.32 | A195S     | No  |
| 6327-p53 | missense | 151757128 | chr3  | T | A        | <i>Gipc2</i>    | NM_016867    | 940   | 310  | 3.67 | M310L     | Yes |
| 6327-p53 | missense | 7110048   | chr11 | A | G        | <i>lgfbp3</i>   | NM_008343    | 739   | 203  | 2.82 | S203P     | Yes |
| 6327-p53 | missense | 174426320 | chr1  | C | T        | <i>lgf9</i>     | NM_033608    | 2510  | 730  | 3.21 | L730F     | Yes |
| 6327-p53 | missense | 62599390  | chr9  | A | G        | <i>ltga11</i>   | NM_176922    | 1300  | 404  | 3.39 | I404V     | Yes |
| 6327-p53 | missense | 120376908 | chr6  | T | A        | <i>Kdm5a</i>    | NM_145997    | 3970  | 1152 | 3.71 | M1152K    | Yes |
| 6327-p53 | missense | 75106684  | chr18 | T | A        | <i>Lipp</i>     | NM_010720    | 1421  | 378  | 3.86 | D378V     | Yes |
| 6327-p53 | missense | 39703629  | chr15 | G | A        | <i>Lrp12</i>    | NM_172814    | 2583  | 837  | 3.56 | P837S     | Yes |
| 6327-p53 | missense | 148867371 | chr4  | A | G        | <i>Lzic</i>     | NM_026963    | 1075  | 134  | 3.72 | I134V     | Yes |
| 6327-p53 | missense | 12305154  | chrX  | A | T        | <i>Med14</i>    | NM_001048208 | 1688  | 472  | 3.7  | M472K     | Yes |
| 6327-p53 | missense | 30697028  | chr5  | A | C        | <i>Otof</i>     | NM_031875    | 1077  | 315  | 3.94 | I315S     | Yes |
| 6327-p53 | missense | 37090068  | chr18 | A | T        | <i>Pcdha1</i>   | NM_054072    | 130   | 44   | 2.33 | T44S      | Yes |
| 6327-p53 | missense | 36731351  | chr9  | T | C        | <i>Pknx2</i>    | NM_148950    | 571   | 136  | 3.67 | K136E     | Yes |
| 6327-p53 | missense | 128935939 | chr2  | T | A        | <i>Polr1b</i>   | NM_009086    | 1241  | 384  | 4.07 | F384I     | Yes |
| 6327-p53 | missense | 4438003   | chr7  | T | C        | <i>Ppp1r12c</i> | NM_029834    | 1001  | 307  | 2.93 | D307G     | Yes |
| 6327-p53 | missense | 77996371  | chr11 | C | T        | <i>Rpl23a</i>   | NM_207523    | 183   | 48   | 3.65 | R48Q      | Yes |
| 6327-p53 | missense | 124831547 | chr5  | G | A        | <i>Sbno1</i>    | NM_001081203 | 3662  | 1199 | 3.49 | P1199S    | Yes |
| 6327-p53 | missense | 32132707  | chr12 | A | G        | <i>Slc26a3</i>  | NM_021353    | 374   | 82   | 4.07 | S82G      | No  |
| 6327-p53 | missense | 61524484  | chrX  | A | G        | <i>Slitrk4</i>  | NM_178740    | 2069  | 584  | 3.63 | L584S     | Yes |
| 6327-p53 | missense | 60576900  | chr11 | T | A        | <i>Top3a</i>    | NM_009410    | 471   | 70   | 3.2  | I70F      | Yes |
| 6327-p53 | missense | 36570305  | chr3  | T | G        | <i>Trpc3</i>    | NM_019510    | 630   | 148  | 3.64 | H148P     | Yes |
| 6327-p53 | missense | 66366372  | chr9  | G | T        | <i>Usp3</i>     | NM_144937    | 1516  | 471  | 4.07 | H471N     | Yes |
| 6327-p53 | missense | 106741016 | chr9  | A | G        | <i>Vprbp</i>    | NM_001015507 | 1124  | 334  | 3.61 | T334A     | Yes |
| 6327-p53 | nonsense | 76539876  | chr15 | C | A        | <i>Recq4</i>    | NM_058214    | 462   | 155  | NA   | E155*     | Yes |

|          |                 |           |       |                        |   |                 |              |      |      |      |          |     |
|----------|-----------------|-----------|-------|------------------------|---|-----------------|--------------|------|------|------|----------|-----|
| 6327-p53 | indel           | 88931096  | chr5  | CCAAATAAA<br>CCCTTTGTG | C | <i>Enam</i>     | NM_017468    | 1512 | NA   | NA   | deletion | Yes |
| 7074-p53 | missense        | 126877946 | chr2  | T                      | G | <i>Ap4e1</i>    | NM_175550    | 1922 | 627  | 3.1  | F627V    | Yes |
| 7074-p53 | missense        | 91510163  | chr7  | A                      | T | <i>Arnt2</i>    | NM_007488    | 120  | 16   | 3.17 | I16K     | Yes |
| 7074-p53 | missense        | 87437591  | chr16 | G                      | A | <i>Rwdd2b</i>   | NM_016924    | 324  | 52   | 3.36 | S52L     | Yes |
| 7074-p53 | missense        | 106495865 | chr7  | T                      | C | <i>Serpinh1</i> | NM_001111043 | 902  | 210  | 3.08 | D210G    | Yes |
| 7074-p53 | missense        | 62784553  | chr10 | A                      | G | <i>Sirt1</i>    | NM_001159590 | 1370 | 449  | 4.07 | V449A    | Yes |
| 7101-p53 | missense        | 26939601  | chr2  | G                      | T | <i>Adams12</i>  | NM_029981    | 589  | 132  | 3.68 | W132L    | Yes |
| 7103-p53 | missense        | 52161233  | chr7  | A                      | G | <i>Ap2a1</i>    | NM_001077264 | 1420 | 426  | 3.44 | L426P    | Yes |
| 7103-p53 | missense        | 108014203 | chr9  | C                      | T | <i>Bsn</i>      | NM_007567    | 6804 | 2227 | 2.56 | G2227D   | Yes |
| 7103-p53 | missense        | 26207929  | chr2  | T                      | C | <i>Card9</i>    | NM_001037747 | 1513 | 505  | 2.12 | K505R    | Yes |
| 7103-p53 | missense        | 106662845 | chr11 | T                      | C | <i>Ccdc45</i>   | NM_177088    | 620  | 179  | 2.93 | I179T    | Yes |
| 7103-p53 | missense        | 84742712  | chr4  | T                      | C | <i>Cntn</i>     | NM_175275    | 3473 | 1112 | 3.1  | L1112P   | Yes |
| 7103-p53 | missense        | 4119067   | chr16 | A                      | T | <i>Crebbp</i>   | NM_001025432 | 2615 | 812  | 3.79 | M812K    | Yes |
| 7103-p53 | missense        | 86457453  | chr4  | T                      | G | <i>Dennd4c</i>  | NM_001081014 | 2762 | 796  | 3.94 | V796G    | Yes |
| 7103-p53 | missense        | 83862513  | chr11 | C                      | A | <i>Dusp14</i>   | NM_019819    | 476  | 68   | 3.86 | W68L     | Yes |
| 7103-p53 | missense        | 55213774  | chr6  | G                      | A | <i>Fam188b</i>  | NM_177883    | 1446 | 441  | 3.11 | G441D    | No  |
| 7103-p53 | missense        | 151172132 | chr5  | A                      | T | <i>Fry</i>      | NM_172887    | 1607 | 423  | 3.84 | N423I    | Yes |
| 7103-p53 | missense        | 18250667  | chr1  | A                      | T | <i>Gm15386</i>  | NM_001040027 | 135  | 46   | 2.48 | C46S     | No  |
| 7103-p53 | missense        | 80965692  | chr10 | G                      | T | <i>Gna15</i>    | NM_010304    | 1327 | 353  | 2.06 | R353S    | Yes |
| 7103-p53 | missense        | 28169151  | chr5  | T                      | A | <i>Htr5a</i>    | NM_008314    | 665  | 55   | 2.07 | F55I     | No  |
| 7103-p53 | missense        | 68102320  | chr17 | C                      | T | <i>Lama1</i>    | NM_008480    | 2133 | 688  | 4.07 | A688V    | Yes |
| 7103-p53 | missense        | 86585576  | chr3  | G                      | T | <i>Lrba</i>     | NM_030695    | 8843 | 2853 | 3.7  | R2853L   | Yes |
| 7103-p53 | missense        | 86350775  | chr3  | T                      | C | <i>Mab21l2</i>  | NM_011839    | 1430 | 280  | 3.46 | Y280C    | Yes |
| 7103-p53 | missense        | 119481461 | chr2  | A                      | T | <i>Ndufaf1</i>  | NM_027175    | 1176 | 304  | 3.33 | I304N    | Yes |
| 7103-p53 | missense        | 37120185  | chr18 | T                      | C | <i>Pcdha5</i>   | NM_009959    | 92   | 31   | 2.91 | L31P     | Yes |
| 7103-p53 | missense        | 75563943  | chr5  | T                      | G | <i>Pdgfra</i>   | NM_001083316 | 906  | 237  | 3.48 | V237G    | Yes |
| 7103-p53 | missense        | 17592279  | chr7  | C                      | T | <i>Ppp5c</i>    | NM_011155    | 1212 | 371  | 2.75 | R371Q    | Yes |
| 7103-p53 | missense        | 154433543 | chr1  | A                      | T | <i>Rgl1</i>     | NM_016846    | 441  | 114  | 3.82 | L114Q    | Yes |
| 7103-p53 | missense        | 46892636  | chr1  | A                      | T | <i>Slc39a10</i> | NM_172653    | 399  | 117  | 2.86 | V117E    | Yes |
| 7103-p53 | missense        | 163681114 | chrX  | C                      | T | <i>Tlr8</i>     | NM_133212    | 2707 | 891  | 3.65 | E891K    | Yes |
| 7103-p53 | missense        | 119441922 | chr14 | T                      | A | <i>Uggt2</i>    | NM_001081252 | 2457 | 789  | 3.86 | T789S    | No  |
| 7103-p53 | missense        | 87904065  | chr5  | T                      | A | <i>Ugt2a2</i>   | NM_001024148 | 117  | 23   | 3.87 | N23I     | No  |
| 7103-p53 | missense        | 121101861 | chr9  | G                      | T | <i>Ulk4</i>     | NM_177589    | 2059 | 634  | 2.61 | T634K    | Yes |
| 7103-p53 | missense        | 53099816  | chr19 | A                      | T | <i>Xpnpep1</i>  | NM_133216    | 175  | 17   | 3.38 | M17K     | Yes |
| 7103-p53 | splice junction | 132121268 | chr2  | T                      | C | <i>Cds2</i>     | NM_138651    | 477  | NA   | 3.17 | NA       | Yes |

**Supplemental Table 4.** Pathogenic prediction algorithm scores to predict deleterious mutations.

| Mouse Tag | Gene   | Amino acid change | Mutation Type | GERP <sup>1</sup> | SIFT <sup>2</sup>              | PolyPhen <sup>3</sup>     | Clin Var <sup>4</sup>                                                                                                                                                                                                                                                |
|-----------|--------|-------------------|---------------|-------------------|--------------------------------|---------------------------|----------------------------------------------------------------------------------------------------------------------------------------------------------------------------------------------------------------------------------------------------------------------|
| 7103-p53  | Crebbp | M812K             | missense      | 3.79              | deleterious (0)                | possibly damaging (0.627) | none                                                                                                                                                                                                                                                                 |
| 6327-p53  | Kdm5a  | M1152K            | missense      | 3.71              | tolerated (0.07)               | benign (0.119)            | none                                                                                                                                                                                                                                                                 |
| 6327-p53  | Vprbp  | T334A             | missense      | 3.61              | deleterious (0.01)             | probably damaging (0.969) | none                                                                                                                                                                                                                                                                 |
| 7914-p53  | ldh1   | R132Q             |               | 2.55              | deleterious low confidence (0) | NA                        | NM_005896.3(IDH1):c.395G>T (p.Arg132Leu)<br>NM_005896.3(IDH1):c.395G>C (p.Arg132Pro)<br>NM_005896.3(IDH1):c.394C>A (p.Arg132Ser)<br>NM_005896.3(IDH1):c.395G>A (p.Arg132His)<br>NM_005896.3(IDH1):c.394C>G (p.Arg132Gly)<br>NM_005896.3(IDH1):c.394C>T (p.Arg132Cys) |
| 4525-p53  | Atm    | L1052R            | missense      | 3.77              | deleterious (0)                | probably damaging (0.935) | NM_000051.3(ATM):c.3149T>G (p.Leu1050Arg)                                                                                                                                                                                                                            |
| 1586-p53  | Fanca  | A550S             | missense      | 3.01              | deleterious (0)                | probably damaging (0.996) | none                                                                                                                                                                                                                                                                 |
| 4525-p53  | Fancd2 | V1300L            | missense      | 3.66              | tolerated (0.25)               | benign (0.23)             | none                                                                                                                                                                                                                                                                 |
| 6323-p53  | Mre11a | S156P             | missense      | 3.49              | deleterious (0.03)             | benign (0.077)            | none                                                                                                                                                                                                                                                                 |
| 7103-p53  | Ppp5c  | R371Q             | missense      | 2.75              | deleterious (0)                | probably damaging (1)     | none                                                                                                                                                                                                                                                                 |
| 6327-p53  | Recql4 | E155*             | nonsense      | NA                | NA                             | NA                        | none                                                                                                                                                                                                                                                                 |
| 7074-p53  | Sirt1  | V449A             | missense      | 4.07              | tolerated (0.28)               | benign (0.05)             | none                                                                                                                                                                                                                                                                 |
| 6327-p53  | Top3a  | I70F              | missense      | 3.2               | deleterious (0)                | probably damaging (0.984) | none                                                                                                                                                                                                                                                                 |
| 6327-p53  | Usp3   | H471N             | missense      | 4.07              | deleterious (0)                | probably damaging (0.984) | none                                                                                                                                                                                                                                                                 |
| 6327-p53  | Rpl23a | R48Q              | missense      | 3.65              | tolerated (0.25)               | benign (0.052)            | none                                                                                                                                                                                                                                                                 |
| 4525-p53  | Rps18  | S149P             | missense      | 2.69              | deleterious (0.04)             | benign (0.307)            | none                                                                                                                                                                                                                                                                 |
| 4525-p53  | Fbn1   | R2308C            | missense      | 3.82              | deleterious (0)                | probably damaging (0.938) | none                                                                                                                                                                                                                                                                 |
| 1586-p53  | Fcrl5  | deletion          | indel         | NA                | NA                             | NA                        | none                                                                                                                                                                                                                                                                 |
| 4525-p53  | Herc5  | insertion         | indel         | NA                | NA                             | NA                        | none                                                                                                                                                                                                                                                                 |
| 6327-p53  | Igfbp3 | S203P             | missense      | 2.82              | tolerated (0.23)               | possibly damaging (0.885) | none                                                                                                                                                                                                                                                                 |
| 1586-p53  | Irak4  | Q183R             | missense      | 3.52              | tolerated (1)                  | NA                        | none                                                                                                                                                                                                                                                                 |
| 7103-p53  | Lrba   | R2853L            | missense      | 3.7               | deleterious (0)                | probably damaging (0.995) | NM_001364905.1(LRBA):c.8551C>T (p.Arg2851Cys)                                                                                                                                                                                                                        |
| 7103-p53  | Pdgfra | V237G             | missense      | 3.48              | deleterious (0)                |                           | NM_006206.6(PDGFR):c.670G>C (p.Val224Leu)<br>NM_006206.6(PDGFR):c.670G>A (p.Val224Met)                                                                                                                                                                               |
| 7103-p53  | Rgl1   | L114Q             | missense      | 3.82              | deleterious (0)                | probably damaging (0.999) | none                                                                                                                                                                                                                                                                 |
| 7103-p53  | Tlr8   | E891K             | missense      | 3.65              | deleterious (0)                | possibly damaging (0.859) | none                                                                                                                                                                                                                                                                 |
| 6327-p53  | Pknox2 | K136E             | missense      | 3.67              | deleterious (0.03)             | possibly damaging (0.902) | none                                                                                                                                                                                                                                                                 |
| 7103-p53  | Xpnp1  | M17K              | missense      | 3.38              | deleterious (0)                | probably damaging (1)     | none                                                                                                                                                                                                                                                                 |
| 7067-luc  | Chd1   | N555K             | missense      | 2.40              | deleterious (0)                | probably damaging (0.996) | none                                                                                                                                                                                                                                                                 |
| 7155-luc  | Usp47  | I40T              | missense      | 3.48              | tolerated (0.34)               | benign (0.01)             | none                                                                                                                                                                                                                                                                 |
| 7073-luc  | Rps21  | N3K               | missense      | 2.9               | deleterious (0.04)             | NA                        | none                                                                                                                                                                                                                                                                 |
| 7073-luc  | Mtm1   | S387T             | missense      | 2.19              | deleterious (0.01)             | benign (0.129)            | NM_000252.2(MTM1):c.1160C>A (p.Ser387Tyr)                                                                                                                                                                                                                            |
| 7068-luc  | Pik3r3 | I256T             | missense      | 3.46              | deleterious (0)                | possibly damaging (0.792) | none                                                                                                                                                                                                                                                                 |
| 7068-luc  | Aff2   | Q118*             | nonsense      | NA                | NA                             | NA                        | none                                                                                                                                                                                                                                                                 |
| 7068-luc  | Ctnnb1 | D780E             | missense      | 3.92              | deleterious (0.01)             | possibly damaging (0.777) | none                                                                                                                                                                                                                                                                 |
| 7068-luc  | Dicer1 | Y1532H            | missense      | 3.97              | deleterious (0)                | probably damaging (0.999) | NM_177438.2(DICER1):c.4638C>A (p.Tyr1546Ter)<br>NM_177438.2(DICER1):c.4637dup (p.Tyr1546Ter)                                                                                                                                                                         |
| 7155-luc  | Gfi1   | I385M             | missense      | 3.73              | deleterious (0)                | probably damaging (0.972) | none                                                                                                                                                                                                                                                                 |
| 7067-luc  | Pbx1   | S349G             | missense      | 2.63              | tolerated (0.98)               | benign (0)                | none                                                                                                                                                                                                                                                                 |
| 7066-luc  | Ski    | Y405N             | missense      | 3.51              | deleterious (0.01)             | NA                        | none                                                                                                                                                                                                                                                                 |
| 7067-luc  | Znfx1  | V291G             | missense      | 3.94              | deleterious (0)                | probably damaging (0.917) | none                                                                                                                                                                                                                                                                 |

<sup>1</sup>Only missense mutations with a GERP score of <2.0 were considered for further evaluation.

<sup>2</sup>The SIFT score ranges from 0.0 (deleterious) to 1.0 (tolerated).

<sup>3</sup>The Polyphen score ranges from 0.15 (benign) to 1.0 (damaging).

<sup>4</sup>ClinVar was used to identify mutations resulting in the identical amino acid shift in humans.

**Supplemental Table 5.** Top Ten Gene Ontology (GO) biological process gene sets that overlap with mutated genes identified by WES.

| GO Gene Set Name                           | # Genes in Gene Set (K) | # Genes in Overlap (k) | k/K    | p-value  | FDR q-value | Gene names*                                                                                          |
|--------------------------------------------|-------------------------|------------------------|--------|----------|-------------|------------------------------------------------------------------------------------------------------|
| CHROMOSOME_ORGANIZATION                    | 1207                    | 15                     | 0.0124 | 5.44E-14 | 4.00E-10    | SIRT1, ATM, CTNNB1, DCAF1, USP3, FANCD2, MRE11, RECQL4, TOP3A, GF11, CREBBP, KDM5A, SKI, CHD1, ZNFX1 |
| DNA_METABOLIC_PROCESS                      | 850                     | 12                     | 0.0141 | 7.44E-12 | 2.41E-08    | SIRT1, ATM, CTNNB1, DCAF1, USP3, FANCD2, MRE11, RECQL4, TOP3A, FANCA, USP47, PPP5C                   |
| COVALENT_CHROMATIN_MODIFICATION            | 467                     | 10                     | 0.0214 | 9.82E-12 | 2.41E-08    | SIRT1, ATM, CTNNB1, DCAF1, USP3, GF11, CREBBP, KDM5A, SKI, CHD1                                      |
| IMMUNE_SYSTEM_DEVELOPMENT                  | 972                     | 12                     | 0.0123 | 3.50E-11 | 6.44E-08    | SIRT1, ATM, CTNNB1, DCAF1, GF11, CREBBP, FANCD2, FANCA, PBX1, PDGFRA, FBN1, HERC6                    |
| CHROMATIN_ORGANIZATION                     | 792                     | 11                     | 0.0139 | 7.84E-11 | 1.15E-07    | SIRT1, ATM, CTNNB1, DCAF1, GF11, CREBBP, USP3, KDM5A, SKI, CHD1, ZNFX1                               |
| DNA_REPAIR                                 | 544                     | 9                      | 0.0165 | 1.18E-09 | 1.45E-06    | SIRT1, ATM, USP3, FANCD2, FANCA, MRE11, RECQL4, USP47, PPP5C                                         |
| REGULATION_OF_HISTONE_MODIFICATION         | 140                     | 6                      | 0.0429 | 3.31E-09 | 3.47E-06    | SIRT1, ATM, CTNNB1, GF11, KDM5A, SKI                                                                 |
| CELL_CYCLE                                 | 1847                    | 13                     | 0.007  | 4.30E-09 | 3.69E-06    | SIRT1, ATM, CTNNB1, GF11, USP3, FANCD2, FANCA, MRE11, RECQL4, USP47, PPP5C, PBX1, TOP3A              |
| SEX_DIFFERENTIATION                        | 268                     | 7                      | 0.0261 | 4.51E-09 | 3.69E-06    | SIRT1, CTNNB1, FANCA, PBX1, KDM5A, PDGFRA, IDH1                                                      |
| INTERSPECIES_INTERACTION_BETWEEN_ORGANISMS | 927                     | 10                     | 0.0108 | 7.41E-09 | 5.45E-06    | SIRT1, CTNNB1, PDGFRA, GF11, MRE11, DCAF1, CREBBP, CHD1, RPL23A, RPS21                               |

\* *TOP3A* gene is in DNA Double Strand Break Repair Super Path (Gene Cards Suite, Pathway Unification Database)

\* IDH1 mutations have been linked to altered DNA repair (Cancer Cell 2016;30(2):337-48)

**Supplemental Table 6.** Number of mutated samples in each histology subtype curated by the Catalogue of Somatic Mutations in Cancer (COSMIC) database.

| <b>Gene</b>   | <b>Hematological Neoplasms*</b> | <b>AML*</b>       | <b>t-MN*</b>  |
|---------------|---------------------------------|-------------------|---------------|
| <i>IDH1</i>   | 1285/33889 (3.79)               | 1068/17717 (6.03) | 15/282 (5.32) |
| <i>ATM</i>    | 478/8077 (5.92)                 | 4/1230 (0.33)     | 1/82 (1.21)   |
| <i>FANCA</i>  | 11/4443 (0.25)                  | 1/934 (0.11)      | 0/43 (0)      |
| <i>FANCD2</i> | 10/4239 (0.24)                  | 0/933 (0)         | 0/43 (0)      |
| <i>MRE11</i>  | 5/4376 (0.11)                   | 1/934 (0.11)      | 0/43 (0)      |
| <i>PPP5C</i>  | 1/4168 (0.02)                   | 0/933 (0)         | 0/42 (0)      |
| <i>RECQL4</i> | 16/4375 (0.37)                  | 13/934 (1.39)     | 0/43 (0)      |
| <i>SIRT1</i>  | 0/4168 (0)                      | 0/933 (0)         | 0/43 (0)      |
| <i>TOP3A</i>  | 7/4168 (0.17)                   | 0/933 (0)         | 0/43 (0)      |
| <i>USP3</i>   | 12/4168 (0.29)                  | 12/933 (1.29)     | 0/43 (0)      |
| <i>USP47</i>  | 3/4168 (0.07)                   | 1/933 (0.11)      | 0/43 (0)      |

\*Total number of mutated samples versus total number of samples analyzed in each subtype; Percent of mutated samples is shown in parentheses; Mutations were limited to frameshift insertions/deletions, missense, nonsense and complex mutations types; *SIRT1* is mutated in non-hematological malignancies

**Supplemental Table S7.** List of primers used for quantitative PCR.

| <b>Gene</b>      | <b>Primer</b>            |
|------------------|--------------------------|
| Cdkn1a (p21)-F   | TTGTCGCTGTCTTGCACTCTGGT  |
| Cdkn1a (p21)-R   | AGACCAATCTGCGCTTGGAGTGAT |
| Cdkn2a (Ink4a)-F | AACTCTTTCGGTCGTACCCC     |
| Cdkn2a (Ink4a)-R | GCGTGCTTGAGCTGAAGCTA     |
| Trp53-F          | AAAGGATGCCCATGCTACAGAGGA |
| Trp53-R          | ATGGGAGCTAGCAGTTTGGGCTTT |
| 18S-F            | CGCCGCTAGAGGTGAAATTCT    |
| 18S-R            | CGAACCTCCGACTTTCGTTCT    |
